# Supplementary material for: Ruthenium terpyridine complexes based on dppz ligands as photodynamic antimicrobial agents against Staphylococcus aureus
Source: Royal Society of Chemistry journal article supplement (doi:10.1039/d3nj04911f), 2024-01-01
Supplement: d3nj04911f1.pdf [file d3nj04911f1.pdf]

Supporting Information

**Ruthenium terpyridine complexes based on dppz ligands as  
photodynamic antimicrobial agents against *Staphylococcus  
aureus***

Supplementary Figures

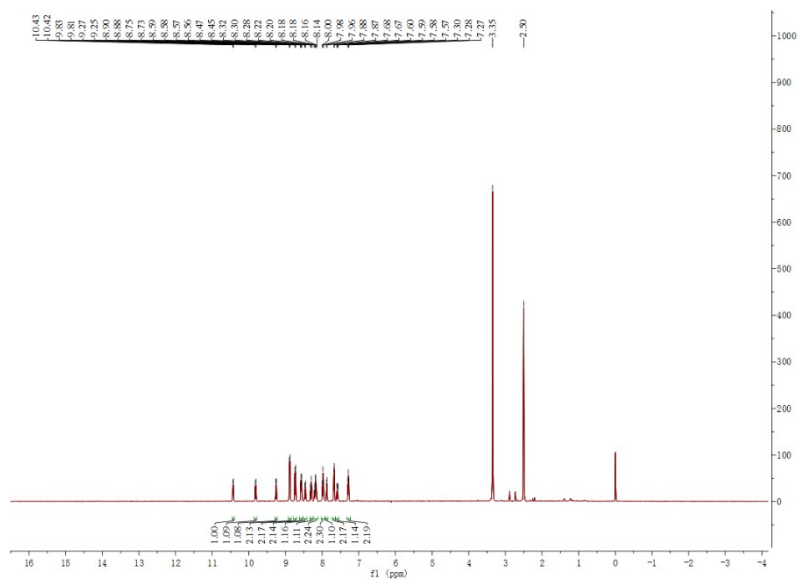

Figure S1  $^1\text{H}$  NMR spectrum of the Ru1.

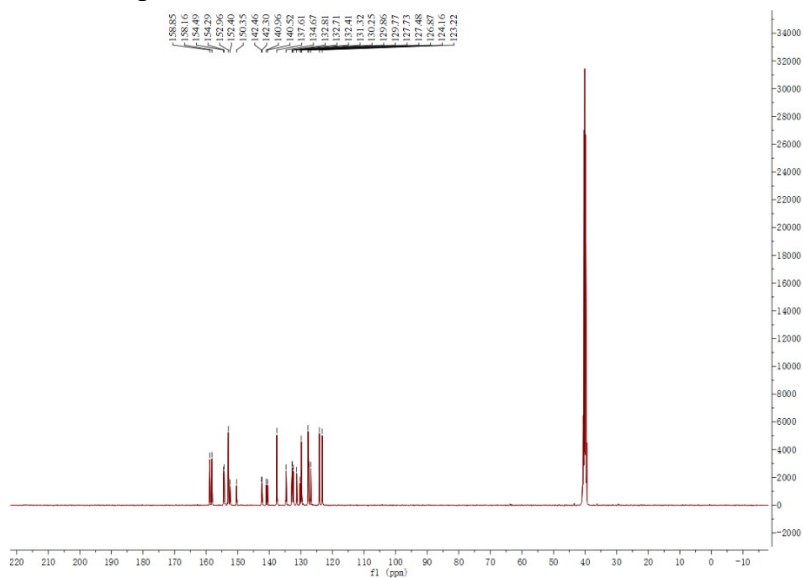

Figure S2  $^{13}\text{C}$  NMR spectrum of the Ru1.

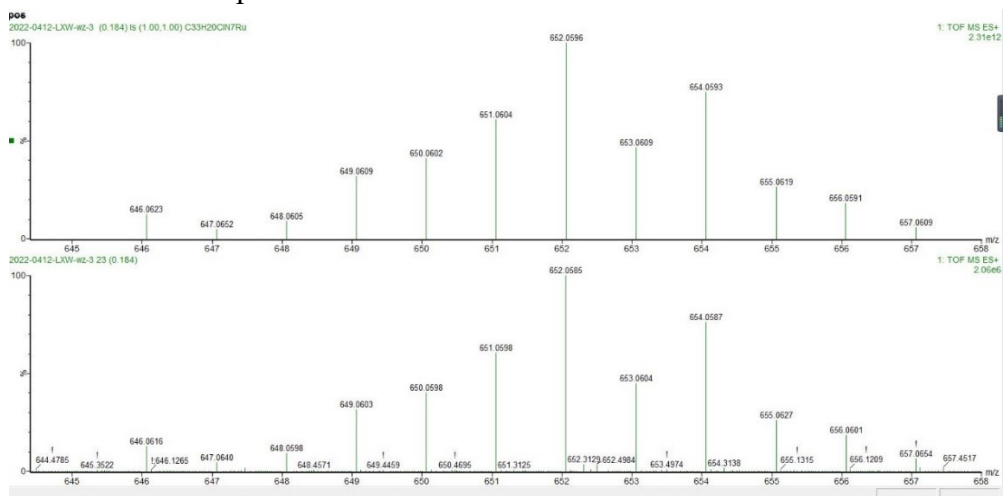

Figure S3 HRESI-MS spectrum of the Ru1.

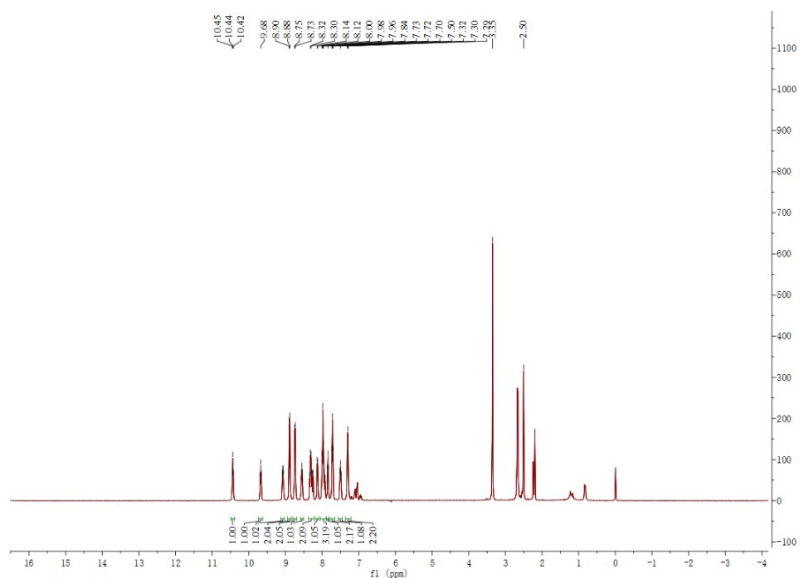

Figure S4  $^1\text{H}$  NMR spectrum of the Ru2.

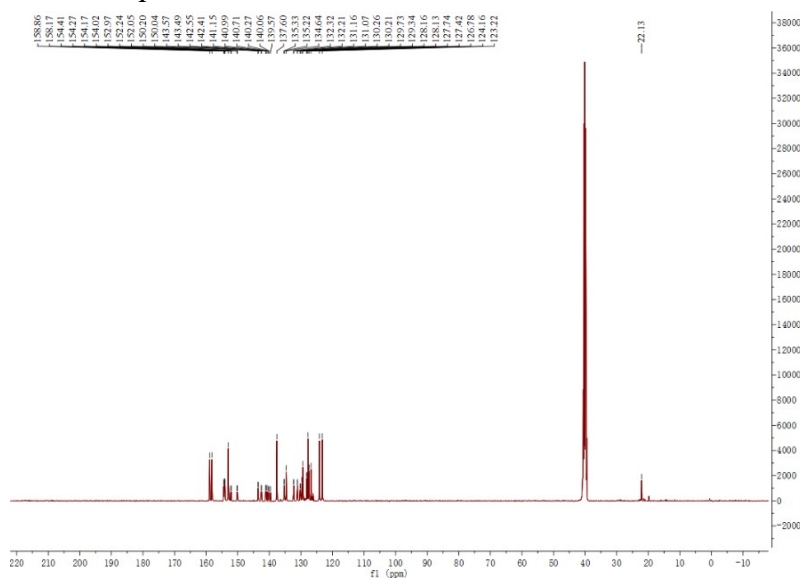

Figure S5  $^{13}\text{C}$  NMR spectrum of the Ru2.

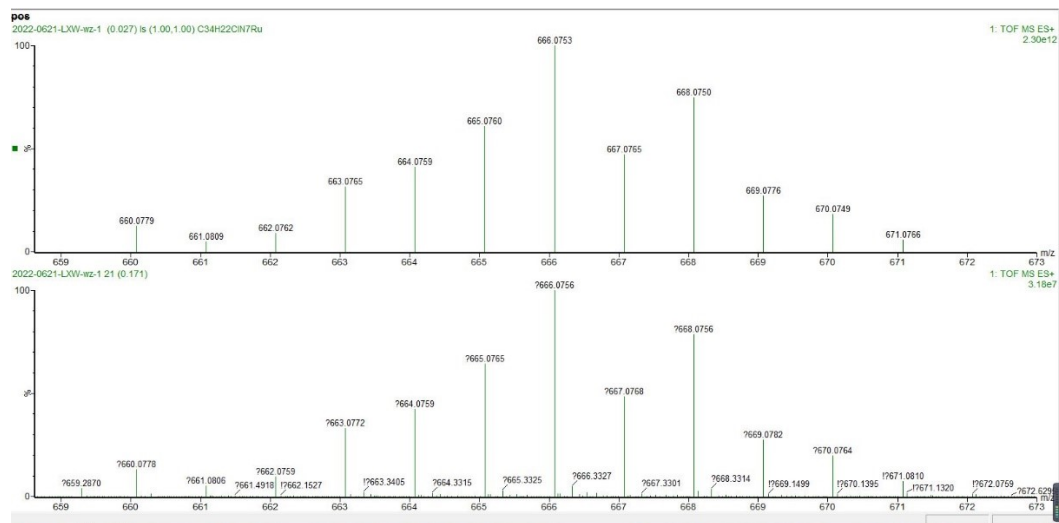

Figure S6 HRESI-MS spectrum of the Ru2.

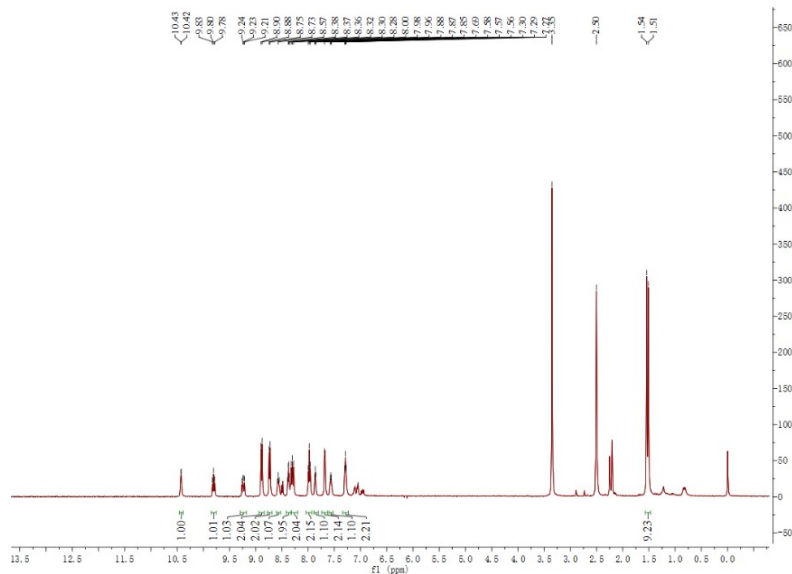

Figure S7  $^1\text{H}$  NMR spectrum of the Ru3.

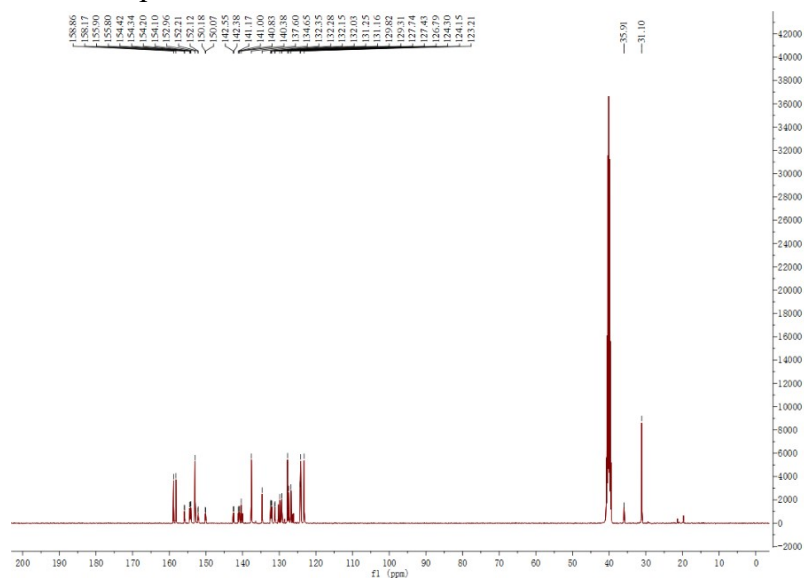

Figure S8  $^{13}\text{C}$  NMR spectrum of the Ru3.

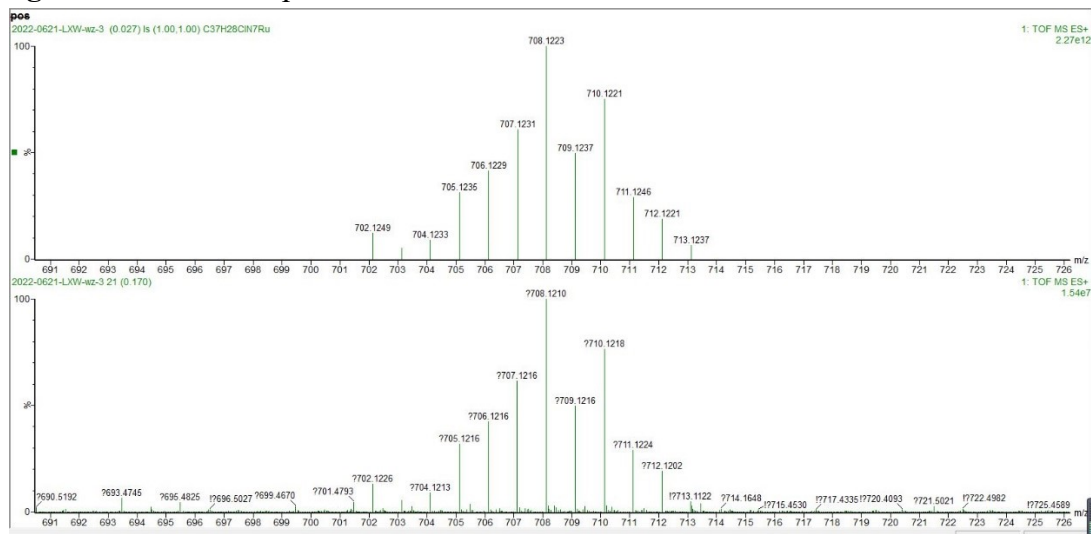

Figure S9 HRESI-MS spectrum of the Ru3.

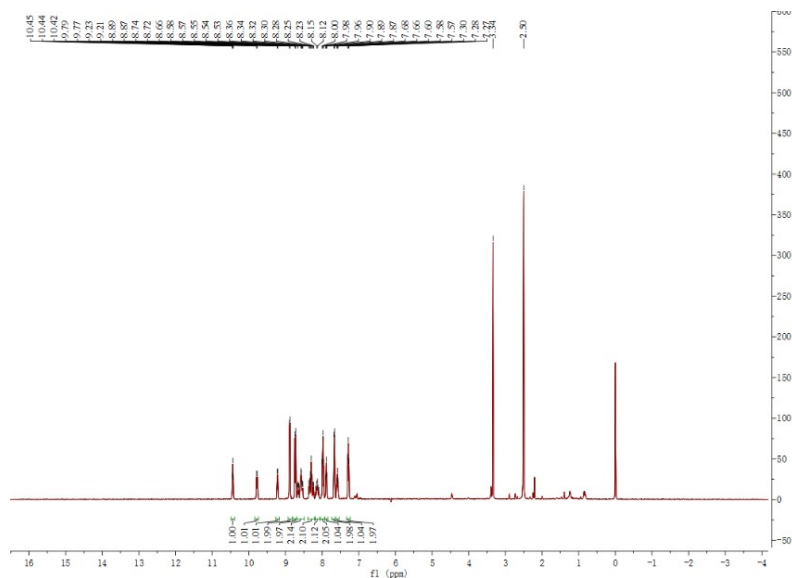

Figure S10  $^1\text{H}$  NMR spectrum of the Ru4.

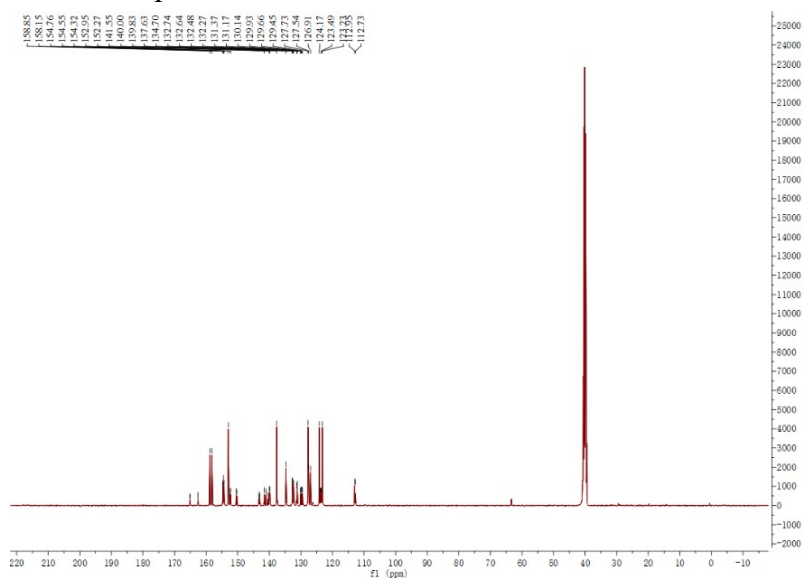

Figure S11  $^{13}\text{C}$  NMR spectrum of the Ru4.

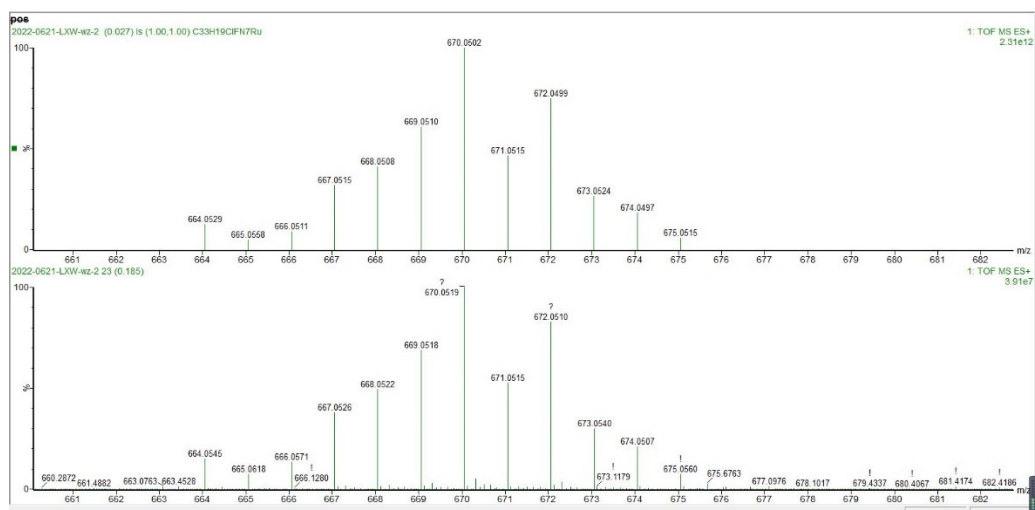

Figure S12 HRESI-MS spectrum of the Ru4.

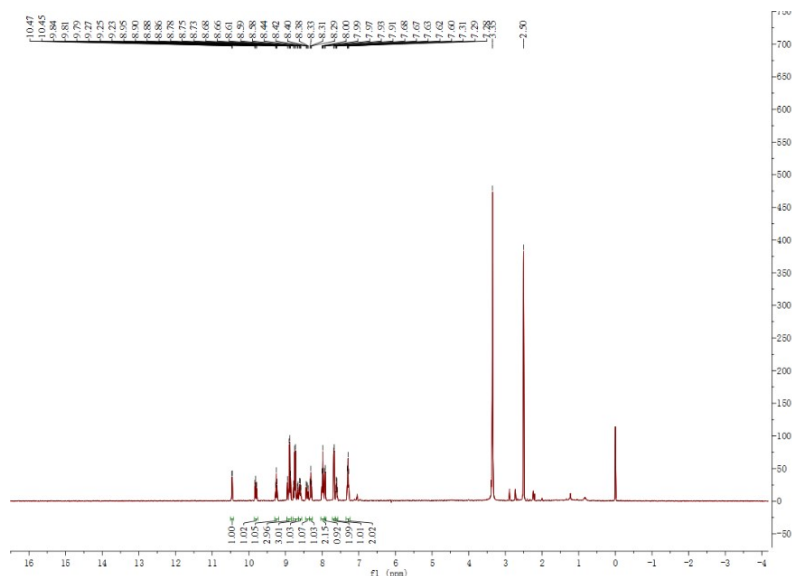

Figure S13  $^1\text{H}$  NMR spectrum of the Ru5.

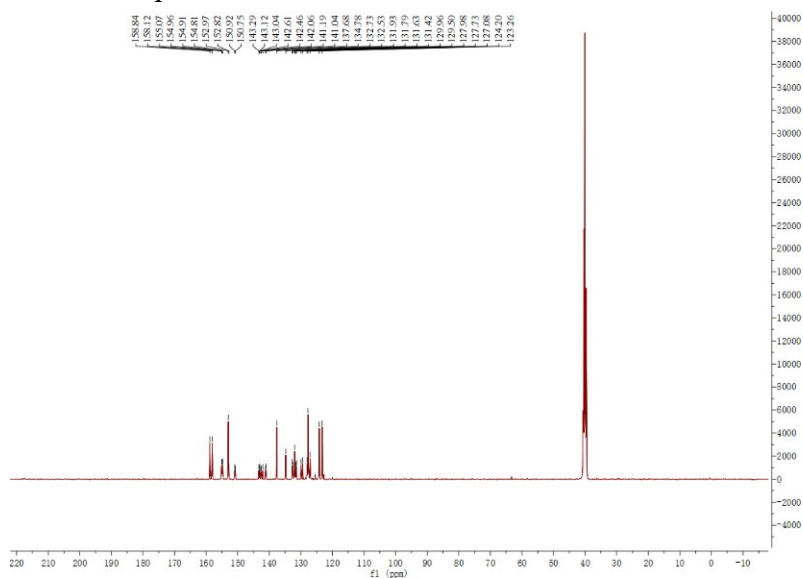

Figure S14  $^{13}\text{C}$  NMR spectrum of the Ru5.

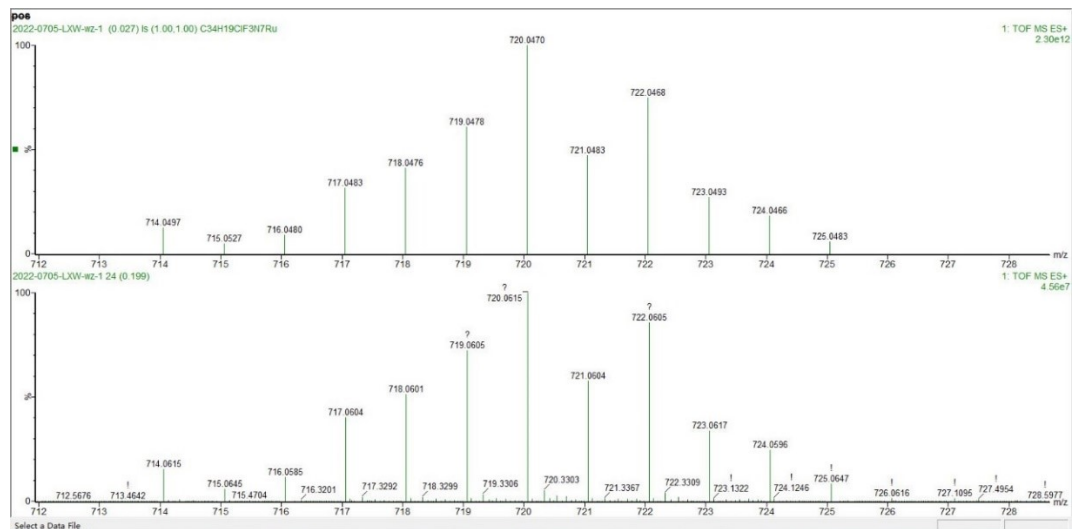

Figure S15 HRESI-MS spectrum of the Ru5.

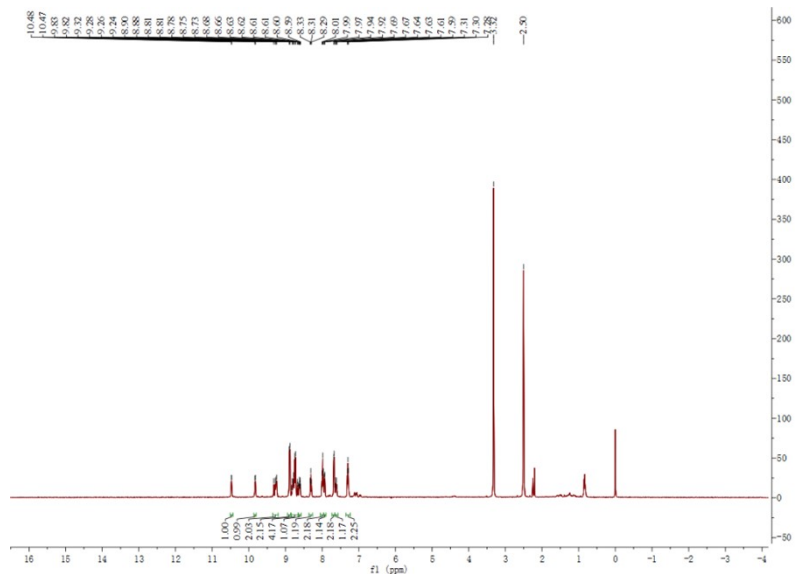

Figure S16  $^1\text{H}$  NMR spectrum of the Ru6.

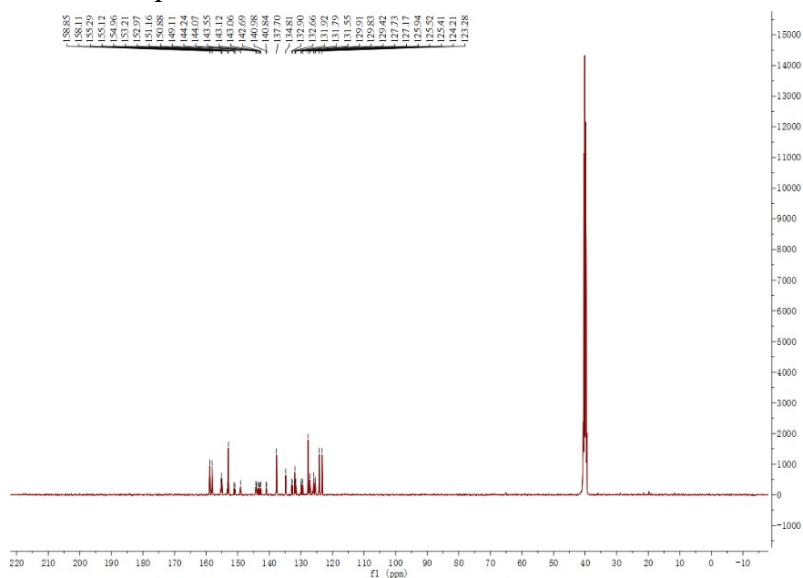

Figure S17  $^{13}\text{C}$  NMR spectrum of the Ru6.

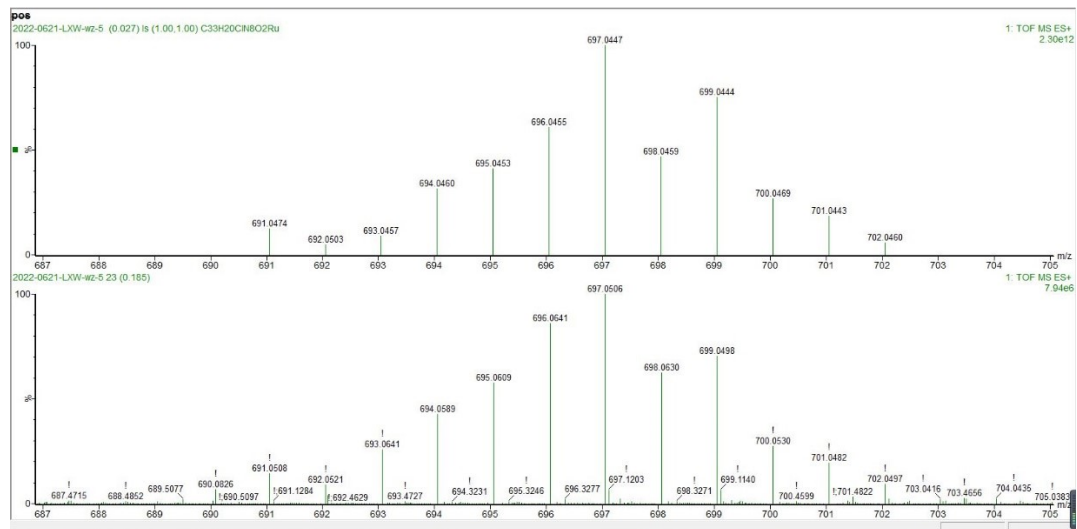

Figure S18 HRESI-MS spectrum of the Ru6.

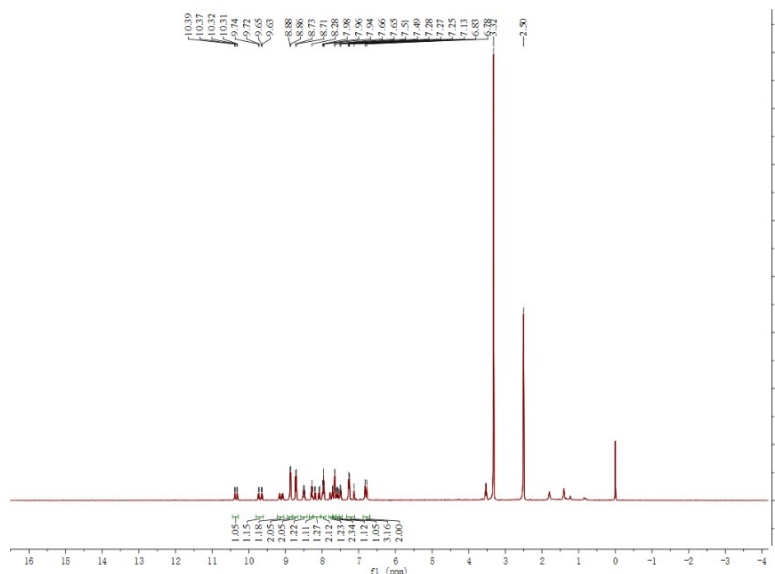

Figure S19  $^1\text{H}$  NMR spectrum of the Ru7.

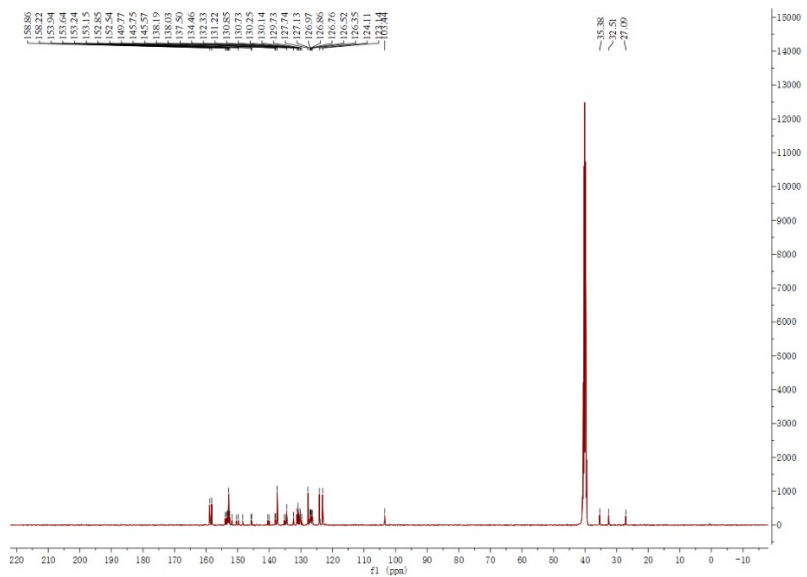

Figure S20  $^{13}\text{C}$  NMR spectrum of the Ru7.

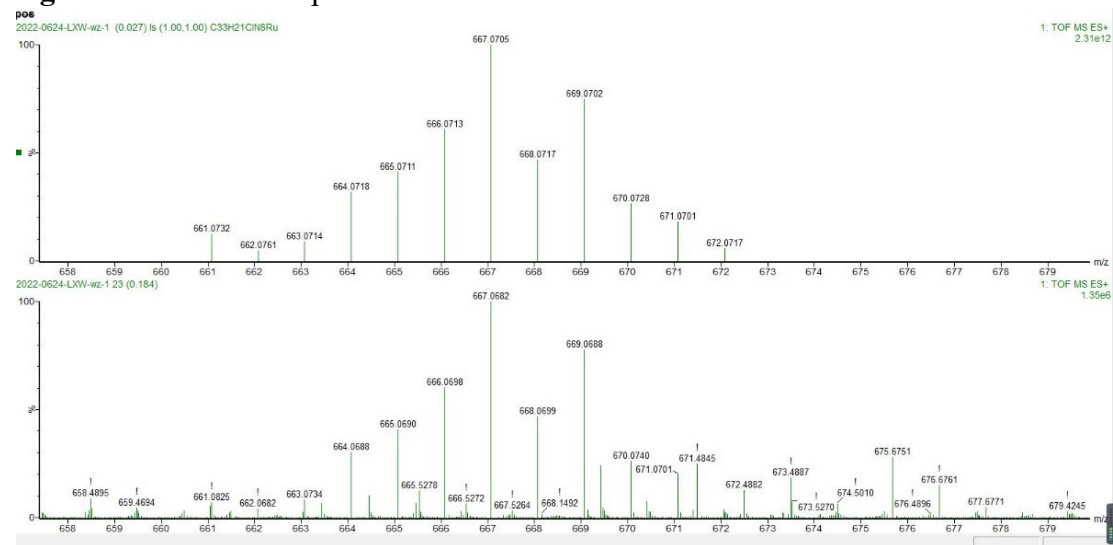

Figure S21 HRESI-MS spectrum of the Ru7.



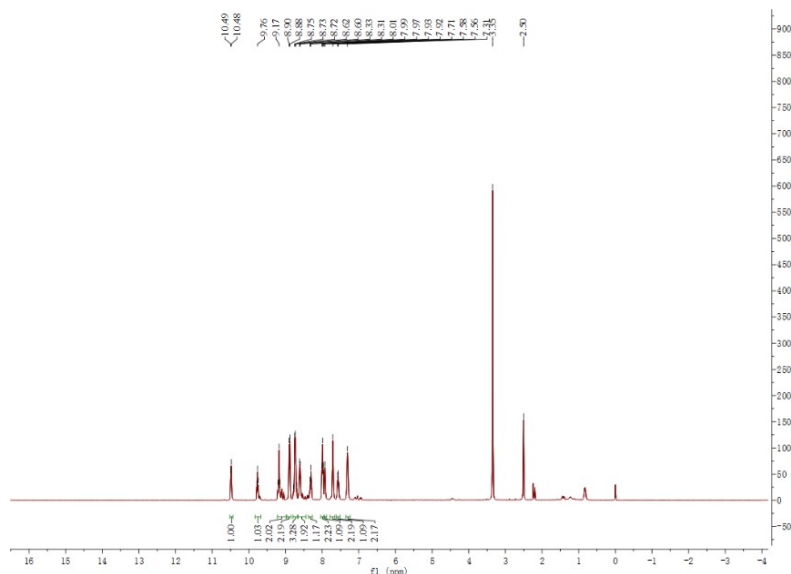

Figure S22  $^1\text{H}$  NMR spectrum of the Ru8.

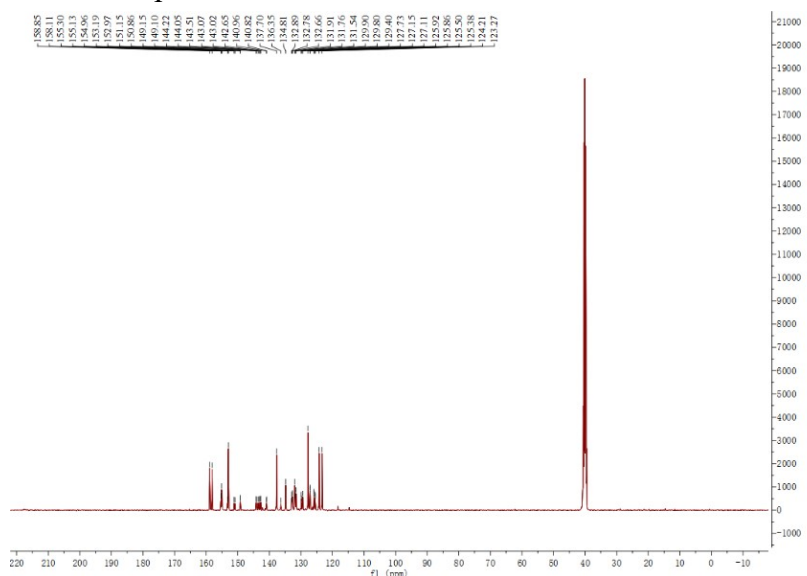

Figure S23  $^{13}\text{C}$  NMR spectrum of the Ru8.

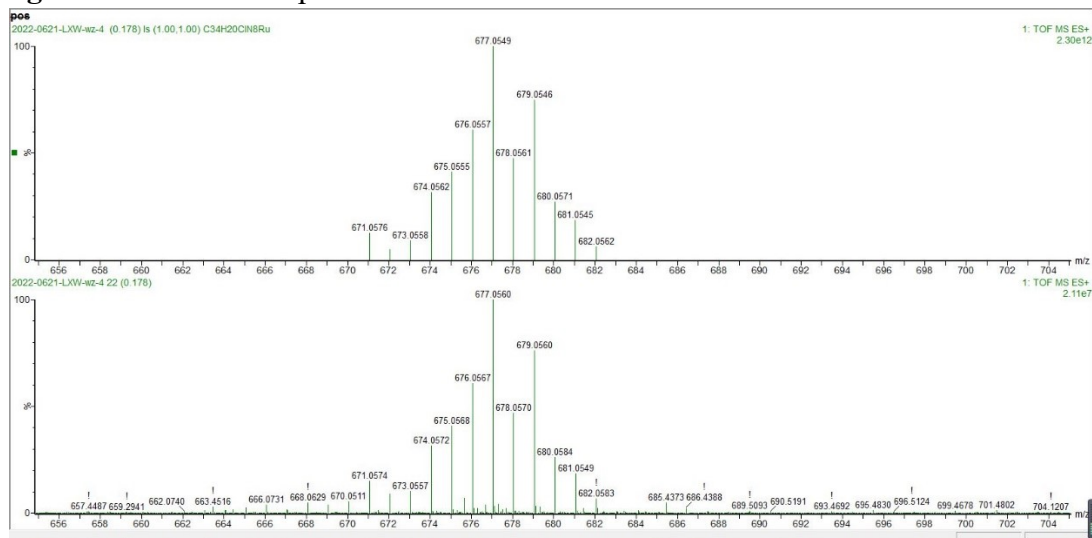

Figure S24 HRESI-MS spectrum of the Ru8.

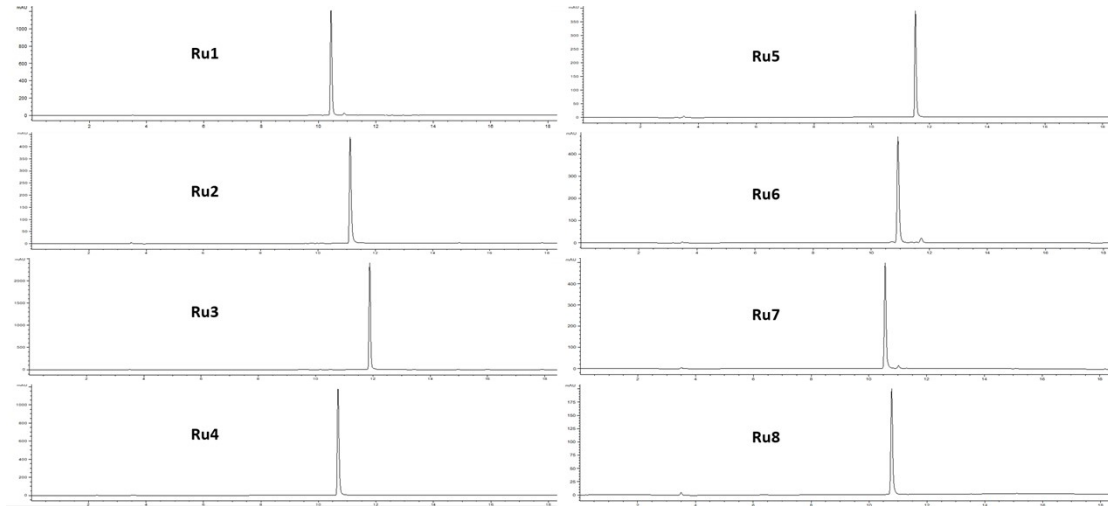

**Figure S25** HPLC spectrums of **Ru1-Ru8**.

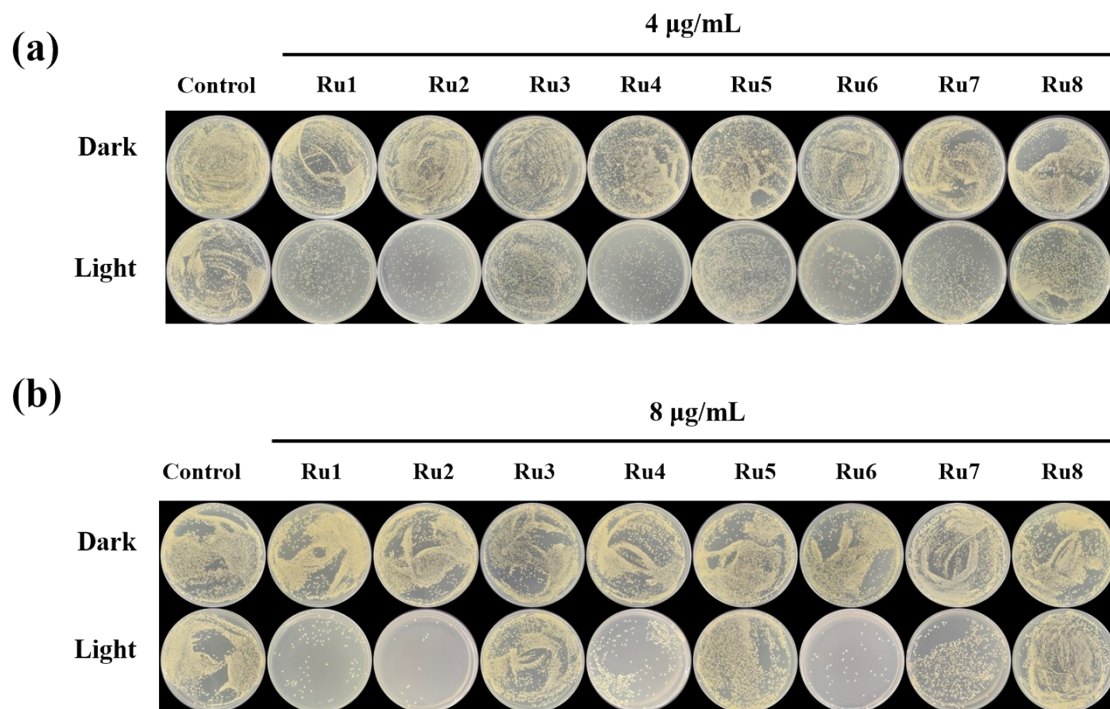

**Figure S26** Photographs of agar plate of *S. aureus* treated with **Ru1-Ru8** (a) 4  $\mu\text{g/mL}$  and (b) 8  $\mu\text{g/mL}$  with or without blue LED light irradiation (25  $\text{mW/cm}^2$ ) for 15 min.

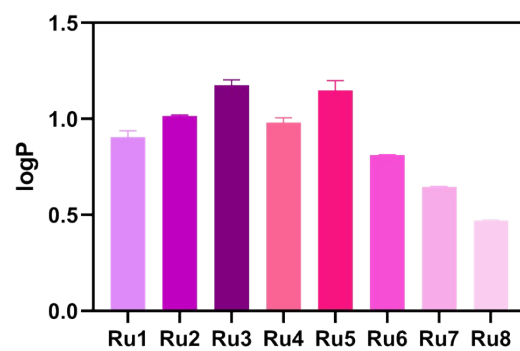

**Figure S27** Octanol/water partition coefficients of **Ru1-Ru8**.

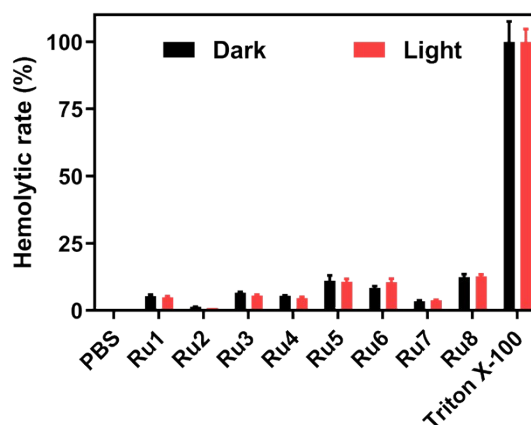

**Figure S28** Hemolysis rate of **Ru1-Ru8** at a concentration of 200  $\mu\text{g}/\text{mL}$  with or without blue LED light irradiation (25  $\text{mW}/\text{cm}^2$ ) for 15 min, Triton X-100 (1%) and PBS were used as the positive and negative control. Data are presented as mean  $\pm$  s.d. ( $n = 3$ ).

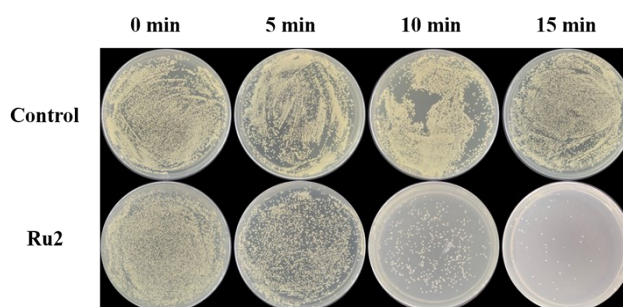

**Figure S29** Photographs of agar plate of *S. aureus* treated with or without **Ru2** (4  $\mu\text{g}/\text{mL}$ ) under blue LED light irradiation (25  $\text{mW}/\text{cm}^2$ ).

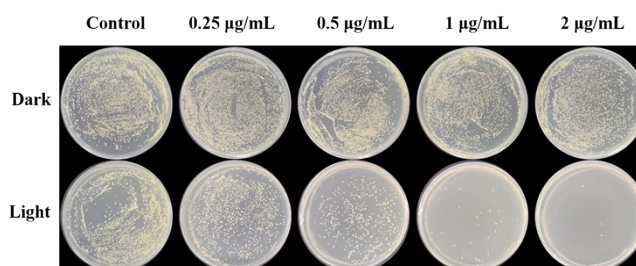

**Figure S30** Photographs of agar plate of *S. aureus* treated with **Ru2** (0, 0.25, 0.5, 1 and 2  $\mu\text{g}/\text{mL}$ ) under dark conditions or with blue LED light irradiation (25  $\text{mW}/\text{cm}^2$ ) for 15 min.

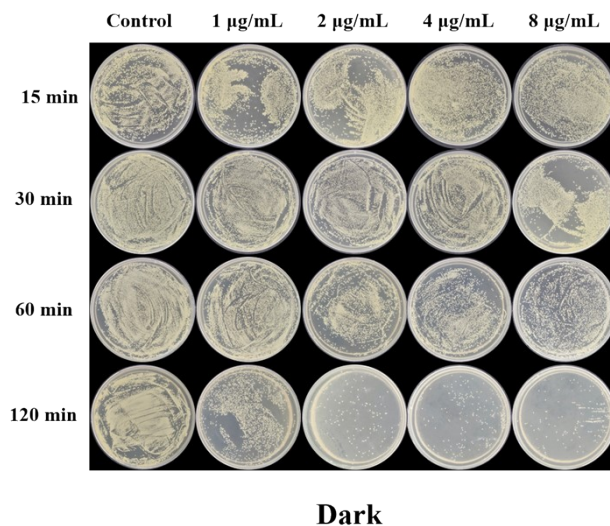

**Figure S31** Photographs of agar plate of the killing kinetics of *S. aureus* treated with different concentrations of **Ru2** under dark conditions for 15 min.

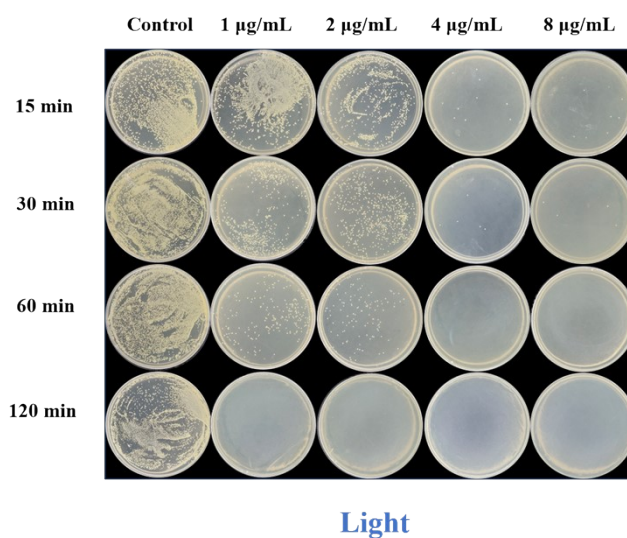

**Figure S32** Photographs of agar plate of the killing kinetics of *S. aureus* treated with different concentrations of **Ru2** under blue LED light irradiation (25 mW/cm<sup>2</sup>) for 15 min.

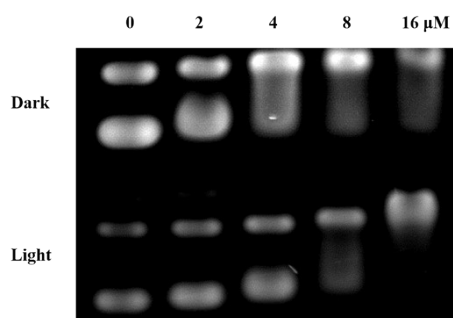

**Figure S33** Agarose gel electrophoresis of pUC19 DNA (12.5  $\mu\text{g/mL}$ ) untreated and treated with 2, 4, 8 and 16  $\mu\text{M}$  **Ru2** under dark conditions 1h or with blue LED light irradiation (25 mW/cm<sup>2</sup>) 5 min.

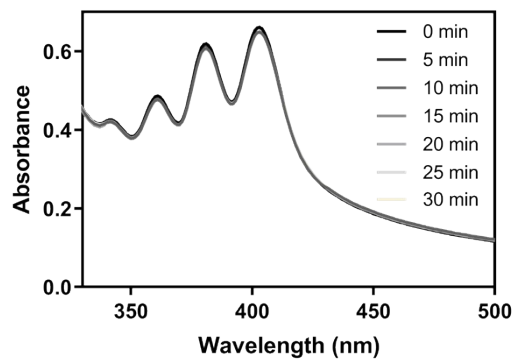

**Figure S34** The photo-stability of DPA in H<sub>2</sub>O/DMSO (9:1) solution under blue LED light irradiation (25 mW/cm<sup>2</sup>).

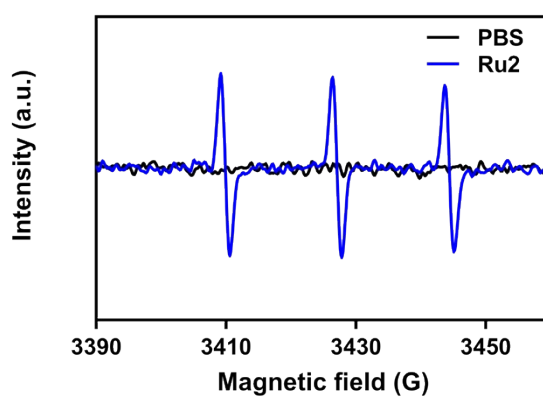

**Figure S35** ESR spectra of <sup>1</sup>O<sub>2</sub> generation by **Ru2** (10 μM) in water under blue LED light irradiation (25 mW/cm<sup>2</sup>, 15 min). PBS with blue LED light irradiation was used as a control.

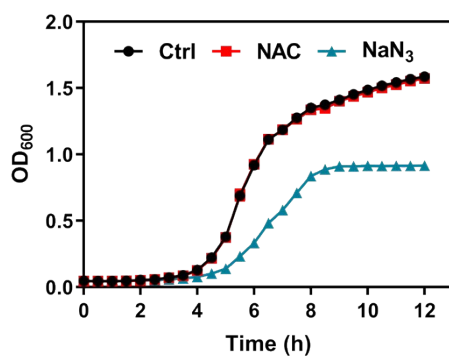

**Figure S36** Growth curves of *S. aureus* in the presence and absence of different scavengers (NAC and NaN<sub>3</sub>).

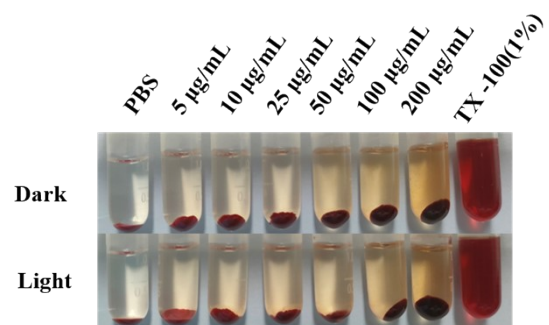

**Figure S37** Representative images of rabbit erythrocytes in the presence of Triton X-100 (1%), PBS, **Ru2**.
